# Supplementary material for: Arabidopsis RAD51, RAD51C and XRCC3 proteins form a complex and facilitate RAD51 localization on chromosomes for meiotic recombination
Source: PubMed Central journal article supplement (PMC5470734; doi:10.1371/journal.pgen.1006827), 2017-05-31

S3 Fig.

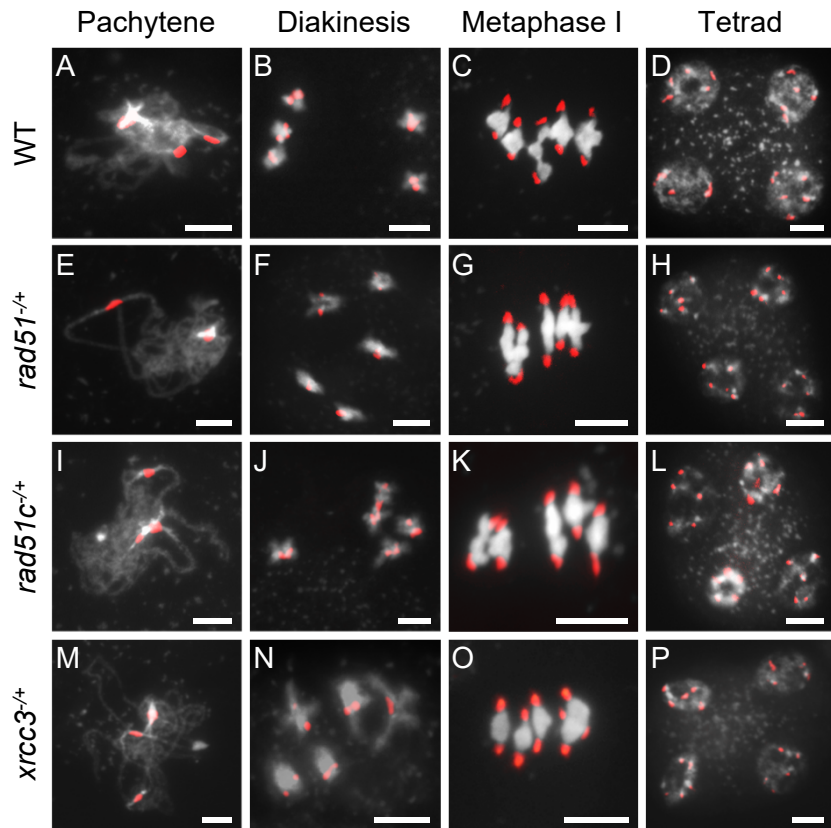

Supplement: pgen.1006827.s003.pdf [file pgen.1006827.s003.pdf]
