# Supplementary material for: Arabidopsis RAD51, RAD51C and XRCC3 proteins form a complex and facilitate RAD51 localization on chromosomes for meiotic recombination
Source: PLoS Genet. 2017 May 31;13(5):e1006827. doi: 10.1371/journal.pgen.1006827 (PMC5470734; doi:10.1371/journal.pgen.1006827)
Supplement: S1 Table — (PDF) [file pgen.1006827.s005.pdf]

S1 Table

| Zygotene                                                    | <i>rad51</i> <sup>-/+</sup> | <i>rad51c</i> <sup>-/+</sup> | <i>xrcc3</i> <sup>-/+</sup> | <i>rad51</i> <sup>-/+</sup><br><i>rad51c</i> <sup>-/+</sup> | <i>rad51</i> <sup>-/+</sup><br><i>xrcc3</i> <sup>-/+</sup> | <i>rad51c</i> <sup>-/+</sup><br><i>xrcc3</i> <sup>-/+</sup> | <i>rad51</i> <sup>-/+</sup><br><i>rad51c</i> <sup>-/+</sup><br><i>xrcc3</i> <sup>-/+</sup> |
|-------------------------------------------------------------|-----------------------------|------------------------------|-----------------------------|-------------------------------------------------------------|------------------------------------------------------------|-------------------------------------------------------------|--------------------------------------------------------------------------------------------|
| WT                                                          | 0.100                       | 0.791                        | 0.140                       | 0.0518                                                      | 0.811                                                      | 0.633                                                       | 0.0519                                                                                     |
| <i>rad51</i> <sup>-/+</sup>                                 |                             | 0.242                        | 0.780                       | 0.588                                                       | 0.123                                                      | 0.271                                                       | 0.995                                                                                      |
| <i>rad51c</i> <sup>-/+</sup>                                |                             |                              | 0.216                       | 0.118                                                       | 0.659                                                      | 0.862                                                       | 0.138                                                                                      |
| <i>xrcc3</i> <sup>-/+</sup>                                 |                             |                              |                             | 0.907                                                       | 0.145                                                      | 0.176                                                       | 0.727                                                                                      |
| <i>rad51</i> <sup>-/+</sup><br><i>rad51c</i> <sup>-/+</sup> |                             |                              |                             |                                                             | 0.0593                                                     | 0.121                                                       | 0.496                                                                                      |
| <i>rad51</i> <sup>-/+</sup><br><i>xrcc3</i> <sup>-/+</sup>  |                             |                              |                             |                                                             |                                                            | 0.528                                                       | 0.0505                                                                                     |
| <i>rad51c</i> <sup>-/+</sup><br><i>xrcc3</i> <sup>-/+</sup> |                             |                              |                             |                                                             |                                                            |                                                             | 0.163                                                                                      |

| Pachytene                                                   | <i>rad51</i> <sup>-/+</sup> | <i>rad51c</i> <sup>-/+</sup> | <i>xrcc3</i> <sup>-/+</sup> | <i>rad51</i> <sup>-/+</sup><br><i>rad51c</i> <sup>-/+</sup> | <i>rad51</i> <sup>-/+</sup><br><i>xrcc3</i> <sup>-/+</sup> | <i>rad51c</i> <sup>-/+</sup><br><i>xrcc3</i> <sup>-/+</sup> | <i>rad51</i> <sup>-/+</sup><br><i>rad51c</i> <sup>-/+</sup><br><i>xrcc3</i> <sup>-/+</sup> |
|-------------------------------------------------------------|-----------------------------|------------------------------|-----------------------------|-------------------------------------------------------------|------------------------------------------------------------|-------------------------------------------------------------|--------------------------------------------------------------------------------------------|
| WT                                                          | 0.000426                    | 4.47E-07                     | 0.000120                    | 2.21E-16                                                    | 1.26E-13                                                   | 1.05E-06                                                    | 4.16E-34                                                                                   |
| <i>rad51</i> <sup>-/+</sup>                                 |                             | 0.364                        | 0.587                       | 0.00261                                                     | 0.000514                                                   | 0.00177                                                     | 5.99E-07                                                                                   |
| <i>rad51c</i> <sup>-/+</sup>                                |                             |                              | 0.829                       | 0.003254                                                    | 0.000689                                                   | 0.00507                                                     | 5.23E-08                                                                                   |
| <i>xrcc3</i> <sup>-/+</sup>                                 |                             |                              |                             | 0.0229                                                      | 0.00528                                                    | 0.00785                                                     | 5.60E-06                                                                                   |
| <i>rad51</i> <sup>-/+</sup><br><i>rad51c</i> <sup>-/+</sup> |                             |                              |                             |                                                             | 0.342                                                      | 0.206                                                       | 0.0000114                                                                                  |
| <i>rad51</i> <sup>-/+</sup><br><i>xrcc3</i> <sup>-/+</sup>  |                             |                              |                             |                                                             |                                                            | 0.499                                                       | 0.00198                                                                                    |
| <i>rad51c</i> <sup>-/+</sup><br><i>xrcc3</i> <sup>-/+</sup> |                             |                              |                             |                                                             |                                                            |                                                             | 0.234                                                                                      |
